# Supplementary material
Source: PubMed Central journal article supplement (PMC7897323)
Supplement: NIHMS1662734-supplement-1.pdf [file NIHMS1662734-supplement-1.pdf]

## 602 5 Supplementary Material

### 603 5.1 Additional Parameters Description for the New PSA Model

| Param         | Description                         | Range            | Unit                                                                           |
|---------------|-------------------------------------|------------------|--------------------------------------------------------------------------------|
| $\mu$         | max proliferation rate              | 0.001 – 0.09     | day <sup>-1</sup>                                                              |
| $\mu_1$       | max proliferation rate (AD cells)   | 0.001 – 0.09     | day <sup>-1</sup>                                                              |
| $\mu_2$       | max proliferation rate (AI cells)   | 0.001 – 0.09     | day <sup>-1</sup>                                                              |
| $q_1$         | min AD cell quota                   | 0.41 – 1.73**    | nmol·day <sup>-1</sup>                                                         |
| $q_2$         | min AI cell quota                   | 0.01 – 0.41**    | nmol·day <sup>-1</sup>                                                         |
| $b$           | baseline PSA production rate        | 0.0001 – 0.1     | $\mu\text{g} \cdot \text{nmol}^{-1} \cdot \text{day}^{-1}$                     |
| $\sigma$      | tumor PSA production rate           | 0.001 – 1        | $\mu\text{g} \cdot \text{nmol}^{-1} \cdot \text{L}^{-1} \cdot \text{day}^{-1}$ |
| $\varepsilon$ | PSA clearance rate                  | 0.0001 – 0.1     | day <sup>-1</sup>                                                              |
| $d_1$         | max AD cell death rate              | 0.001 – 0.09     | day <sup>-1</sup>                                                              |
| $d_2$         | max AI cell death rate              | 0.01 – 0.001     | day <sup>-1</sup>                                                              |
| $\delta_1$    | density death rate                  | 1 – 90           | L <sup>-1</sup> ·day <sup>-1</sup>                                             |
| $\delta_2$    | density death rate                  | 1 – 90           | L <sup>-1</sup> ·day <sup>-1</sup>                                             |
| $R_1$         | AD death rate half-saturation       | 0 – 3            | nmol·L <sup>-1</sup>                                                           |
| $R_2$         | AI death rate half-saturation       | 1 – 6            | nmol·L <sup>-1</sup>                                                           |
| $c$           | maximum mutation rate               | 0.00001 – 0.0001 | day <sup>-1</sup>                                                              |
| $K$           | mutation rate half-saturation level | 0.8 – 1.7        | nmol·day <sup>-1</sup>                                                         |
| $m$           | diffusion rate from $A$ to $Q$      | 0.01 – 0.9       | day <sup>-1</sup>                                                              |
| $x_1(0)$      | Initial subpopulation of AD cells   | 0.009 – 0.02     | L                                                                              |
| $x_2(0)$      | Initial subpopulation of AI cells   | 0.0001 – 0.001   | L                                                                              |

Table 5: Additional parameter definition and range provided in [21]. \*\* Minimum AD and AI cell quota should be patient specific, therefore we choose the ranges for  $q_1$  and  $q_2$ , respectively, to be  $(b + 0.2, b + 0.5)$  and  $(0.01, b + 0.2)$ , where  $b$  is the minimum androgen value data for each individual patient.

### 604 5.2 Synergistic Effects Between Drug Therapies

605 To build on the Dosage Variation Simulations we consider simulations broader range of  
606 dosage levels and over two time intervals: during the first on-drug period (0.5 cycle) of

607 therapy and after 1.5 cycles of therapy (corresponding to the parameter-fitting interval used  
 608 for all patients).

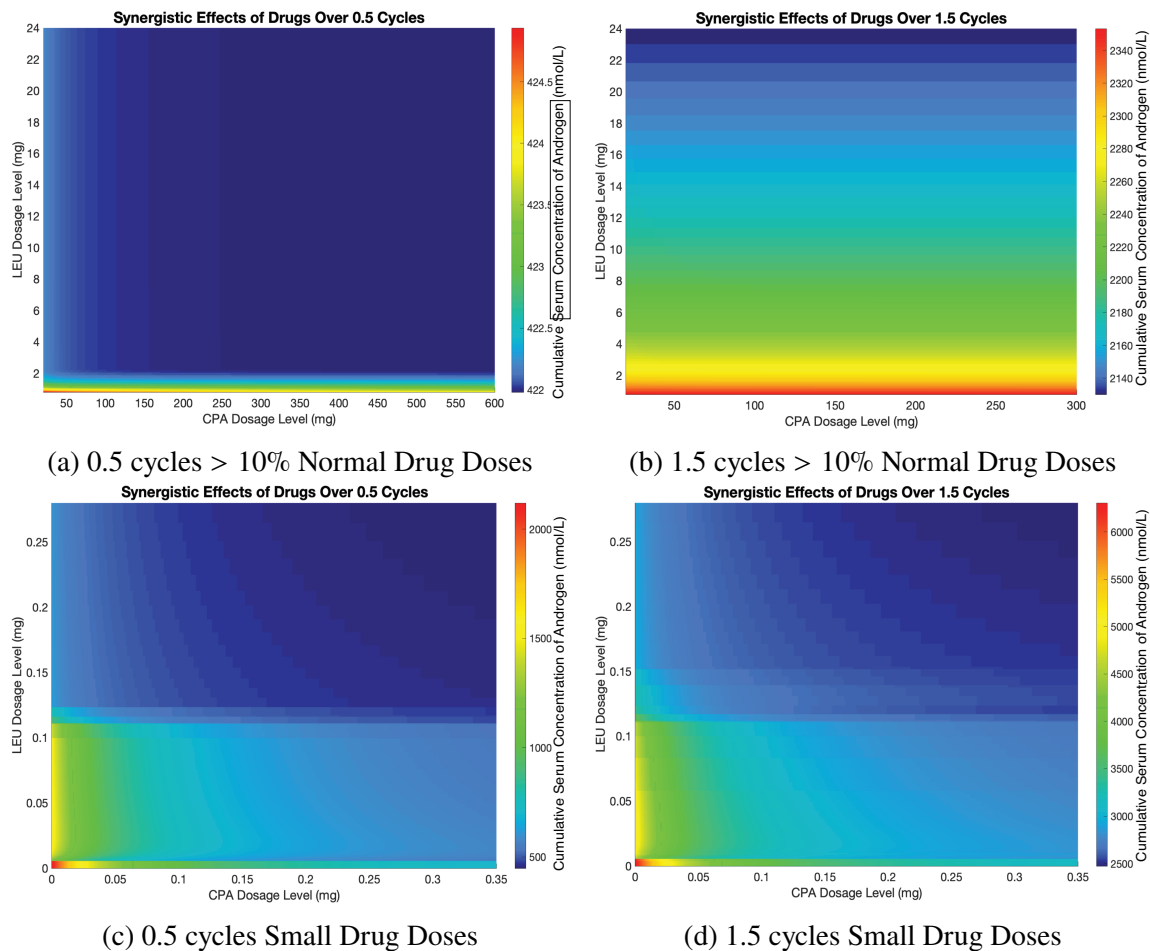

Figure 10: Simulated total androgen production across different time scales and dosage ranges from the New Androgen Model using parameters and dosing times for Patient 15. (The color scales differ in each panel.) (a) Heat map showing cumulative serum concentration of androgen over 0.5 cycle of therapy for LEU dosage levels from 0.8–24 mg and CPA dosages from 20–60 mg (a  $550 \times 550$  grid is shown). (b) Cumulative serum concentration of androgen over 1.5 cycles of therapy using the same dosage ranges as (a). (c) Cumulative serum concentration of androgen over 0.5 cycles of therapy for LEU dosages from 0–0.14 mg and CPA dosages from 0–0.25 mg. (d) Cumulative serum concentration of androgen 1.5 cycles of therapy for LEU dosages from 0–0.16 mg and CPA dosages from 0–2 mg.

609 Figure 10 shows the results of simulations of the New Androgen Model using the dosage  
610 administration times for Patient 15 and the parameters in Table 2. Dosages of CPA and  
611 LEU are simulated at various ranges of dosages: close to the usual clinical ranges in panels  
612 (a) and (b), and at small dosages in (c) and (d), forming a  $550 \times 550$  grid. For each choice of  
613 drug dosage, the New Androgen Model is run for either 0.5 cycles of treatment (panels (a)  
614 and (c)) or for 1.5 cycles (panels (b) and (d)). In all cases, the net production of androgen,  
615 i.e., the integral of  $A(t)$  as simulated by Eq. (8) is estimated over the corresponding interval.

616 Over the first half-cycle of treatment (corresponding to the first on-drug period), the  
617 cumulative serum concentration of androgen predicted by the model is largely insensitive  
618 to dosage over the simulated ranges, as shown in Fig. 10(a). In contrast, the cumulative  
619 serum concentration of androgen production over 1.5 cycles of therapy, which includes  
620 the first treatment hiatus, decreases approximately linearly with LEU dosage. Because the  
621 modeled drug effects are multiplicative, androgen production is suppressed whenever the  
622 level of either CPA or LEU is sufficiently high (cf. Fig. 3). Furthermore, as described  
623 above, androgen production becomes insensitive to CPA dosage after LEU desensitizes the  
624 gonadotropic pathway, which occurs 7 to 21 days after initial injection [36]. LEU also has  
625 slower clearance rates than CPA (cf. Table 1) and so is effective longer.

626 Both Figures 10a and 10c are over 281 days, which represents the first 0.5 cycles for  
627 patient 15. In contrast to Figure 10a, Figure 10c focuses on the dynamics around very  
628 small doses for both drugs. The most interesting dynamics happen for LEU dosage of  
629 0.0055mg. The sharp increase of androgen at this value occurs due to a  $L^*$  value of  
630 0.0055mg for patient 15. If the LEU dosage remains below the  $L^*$  level, the LEU effect,  
631 Equation (15), never proceeds to the spike and desensitizing behavior. The lack of spiking  
632 and desensitizing behavior in androgen production aligns with the pharmacology report  
633 on LEU [38]. The second sharp increase in cumulative serum concentration of androgen  
634 occurs around a dosage of 0.11mg for LEU. In this case, the increase is due to the feature  
635 that doses between 0.0055mg-0.11mg lead to a spiking and desensitizing phase, but do not  
636 maintain levels above  $L^*$  long enough for desensitization to occur, only spiking. However,  
637 above the 0.11mg dosage level, desensitization occurs and a drop in androgen occurs more  
638 predictably as seen in 10a. Given the amount of time between dosages of the drugs, as  
639 seen in Figure 3 from the main paper, it should be noted that the clinical administration of  
640 either drug at such low levels is not consistent with treatment of prostate cancer.

### 641 5.3 New PSA Model Sensitivity Analysis

#### 642 5.3.1 Local Sensitivity Analysis

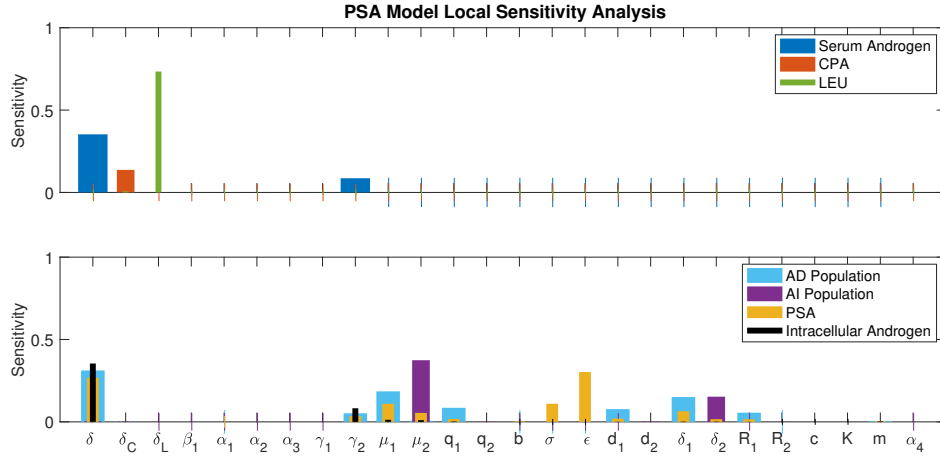

Figure 11: **(Top)** Normalized sensitivity for serum androgen (strong blue), LEU mass (vivid orange), and CPA mass (dark green) with respect to each parameter of the full model. **(Bottom)** Normalized sensitivity for androgen-dependent population (soft blue), androgen-independent population (dark moderate magenta), intracellular androgen (vivid yellow) and prostate-specific antigen (black) with respected to each parameter of the full New PSA Model. **Note:**  $\delta$ ,  $\delta_1$ ,  $\delta_2$ ,  $\beta_1$ ,  $\alpha_1$ ,  $\alpha_2$ ,  $\alpha_3$ ,  $\alpha_4$ ,  $\gamma_1$  and  $\gamma_2$  parameter values are those of the New Androgen Model depicted in Figure 8.

#### 643 5.3.2 Global Sensitivity Analysis

644 In this section, we use Sobol's indices [64], a variance-based method, to perform global  
 645 sensitivity analysis (GSA). Consider a nonlinear mathematical model,  $f$ , with scalar output,  
 646  $y$ :

$$y = f(q) \quad (27)$$

647 where  $q = [q_1, q_2, \dots, q_p] \in Q_p \subseteq \mathbb{R}^p$  with  $q$  is a vector of model parameters and  $Q_p$  is  
 648 the admissible sample space for model parameters.

649 The first-order Sobol's indices are defined by:

$$S_i = \frac{\text{var} [\mathbb{E}(y|q_i)]}{\text{var}(y)} \quad (28)$$

650 with  $S_i$  is the influential measurement of parameter  $q_i$  on the variance of model output  $y$ .  
 651 The total-effect Sobol's indices that account for both first-order and higher-order effects  
 652 are given by:

$$S_{Ti} = 1 - \frac{\text{var}[\mathbb{E}(y|q_{\sim i})]}{\text{var}(y)} = \frac{\mathbb{E}[\text{var}(y|q_{\sim i})]}{\text{var}(y)}. \quad (29)$$

653 However, it is computationally expensive to use the original Sobol's indices method. In-  
 654 stead, we used a numerical approximation approach that was introduced and improved in  
 655 [65, 66, 67]. The algorithm is later summarized in [68] and described as follows:

656 1. Create two  $M \times p$  matrices,  $\mathbf{A}$  and  $\mathbf{B}$ :

$$\mathbf{A} = \begin{bmatrix} q_1^1 & \dots & q_i^1 & \dots & q_p^1 \\ \vdots & & & & \vdots \\ q_1^M & \dots & q_i^M & \dots & q_p^M \end{bmatrix}, \quad \mathbf{B} = \begin{bmatrix} \hat{q}_1^1 & \dots & \hat{q}_i^1 & \dots & \hat{q}_p^1 \\ \vdots & & & & \vdots \\ \hat{q}_1^M & \dots & \hat{q}_i^M & \dots & \hat{q}_p^M \end{bmatrix}$$

657 with each entries  $q_i^j$  and  $\hat{q}_i^j$  are quasi-random numbers being drawn uniformly from  
 658 the range of the  $i$ th parameter at the  $j$ th realization. Here, we chose  $M = 1000$ , i.e.  
 659 1000 realizations.

660 2. Create  $p$  matrices  $\mathbf{C}_A^i$ :

$$\mathbf{C}_A^i = \begin{bmatrix} q_1^1 & \dots & \hat{q}_i^1 & \dots & q_p^1 \\ \vdots & & & & \vdots \\ q_1^M & \dots & \hat{q}_i^M & \dots & q_p^M \end{bmatrix}$$

661 by replacing the  $i$ th column of matrix  $\mathbf{A}$  by the  $i$ th column of matrix  $\mathbf{B}$ . And create  
 662  $p$  matrices  $\mathbf{C}_B^i$ :

$$\mathbf{C}_B^i = \begin{bmatrix} \hat{q}_1^1 & \dots & q_i^1 & \dots & \hat{q}_p^1 \\ \vdots & & & & \vdots \\ \hat{q}_1^M & \dots & q_i^M & \dots & \hat{q}_p^M \end{bmatrix}$$

663 by replacing the  $i$ th column of matrix  $\mathbf{B}$  by the  $i$ th column of matrix  $\mathbf{A}$ .

664 3. Compute  $M \times 1$  vectors of the model outputs:

$$y_A = f(\mathbf{A}), \quad y_B = f(\mathbf{B}), \quad y_{C_A^i} = f(\mathbf{C}_A^i), \quad y_{C_B^i} = f(\mathbf{C}_B^i)$$

665 with  $y_A^j$ ,  $y_B^j$ ,  $y_{C_A^i}^j$ , and  $y_{C_B^i}^j$  correspond to the model output evaluated at the  $j$ th row  
 666 vectors of parameters of matrices  $\mathbf{A}$ ,  $\mathbf{B}$ ,  $\mathbf{C}_A^i$ , and  $\mathbf{C}_B^i$ , respectively.

667 4. Append  $y_A$  and  $y_B$  to obtain  $2M \times 1$  vector  $y_D$ .

$$y_D = \begin{bmatrix} y_A \\ y_B \end{bmatrix}$$

668 5. Use Monte Carlo integration to approximate the first-order Sobol's indices:

$$S_i = \frac{\text{var}[\mathbb{E}(y|q_i)]}{\text{var}(y)} \approx \frac{\frac{1}{M} \left[ y_A^\top y_{C_B^i} - y_A^\top y_B \right]}{\frac{1}{2M} y_D^\top y_D - [\mathbb{E}(y_D)]^2} \quad (30)$$

669 and total-effects Sobol's indices:

$$S_{Ti} = \frac{\mathbb{E}[\text{var}(y|q_{\sim i})]}{\text{var}(y)} \approx \frac{\frac{1}{2M} \left[ y_A^\top y_A - 2y_A^\top y_{C_A^i} + y_{C_A^i}^\top y_{C_A^i} \right]}{\frac{1}{2M} y_D^\top y_D - [\mathbb{E}(y_D)]^2} \quad (31)$$

670 where  $\mathbb{E}(y_D) \approx \frac{1}{2M} \sum_{j=1}^{2M} y_D^j$ .

671 Finally, since the total-effects Sobol's indices consider both first-order effect of  $q_i$  and high-  
 672 order interaction effects involving  $q_i$ , we only discuss the results for the total-effects indices.  
 673 We plot the value of the total-effects indices in Figure 12. It is worth to mention that there  
 674 are cases where the total-effects indices are negative. However, in these cases, the order of  
 675 magnitudes are between  $-16$  and  $-15$ . Therefore, we consider them as discrepancies due  
 676 to numerical approximations and plotted their absolute values instead.

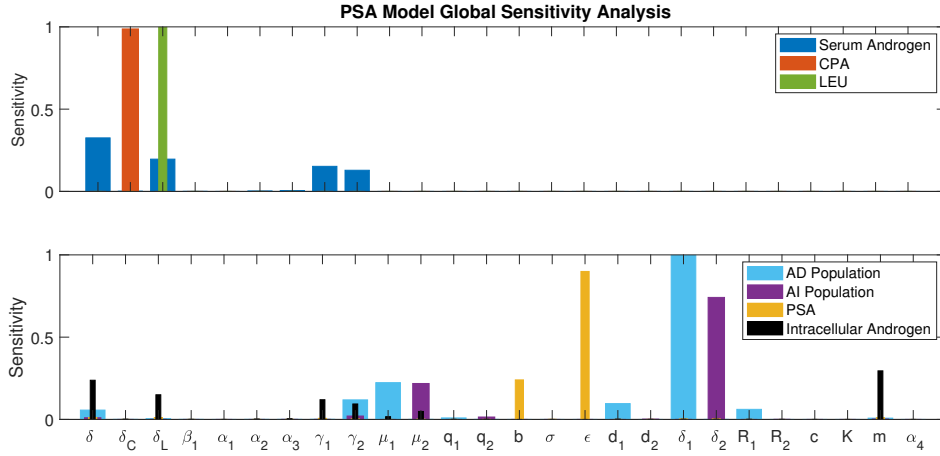

Figure 12: **(Top)** Total-effects Sobol's indices for serum androgen (blue), LEU mass (orange), and CPA mass (green) with respect to each parameter of the full model. **(Bottom)** Total-effects Sobol's indices for androgen-dependent population (blue), androgen-independent population (magenta), intracellular androgen (yellow) and prostate-specific antigen (black) with respect to each parameter of the full New PSA Model. **Note:**  $\delta$ ,  $\delta_1$ ,  $\delta_2$ ,  $\beta_1$ ,  $\alpha_1$ ,  $\alpha_2$ ,  $\alpha_3$ ,  $\alpha_4$ ,  $\gamma_1$  and  $\gamma_2$  parameter values are those of the New Androgen Model depicted in Figure 8.

**Drug Effect on Testes Androgen for Patient15**

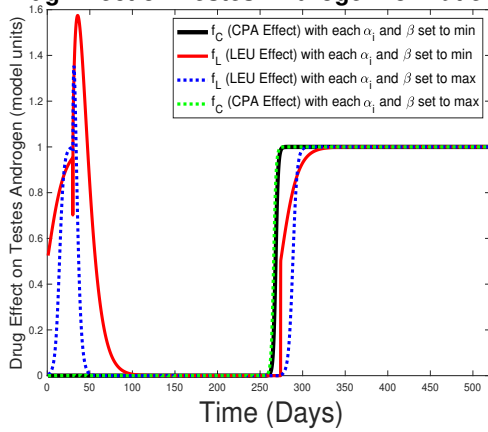

(a)

**Androgen for Patient15**

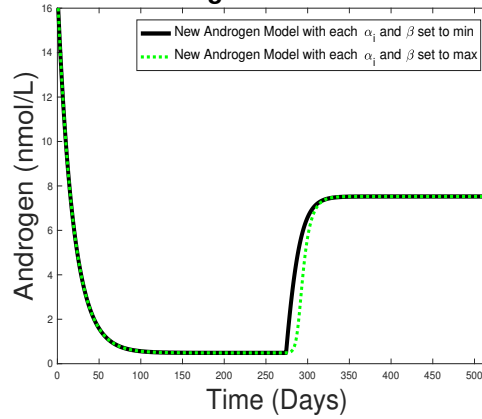

(b)

**PSA for Patient15**

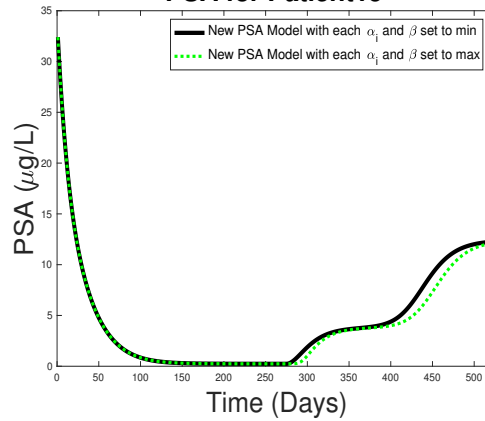

(c)

Figure 13: The New Androgen Model and the New PSA Model run over one full cycle (for patient 15, 520 days) with the minimum and maximum values of each respect  $\alpha_i$  parameter range and  $\beta$  parameter range. All other parameters remain constant and are pulled from patient 15's fitting.





677 **5.4 Additional Figures**

678 **5.4.1 Additional Figures for Dynamics of the New Androgen Model**

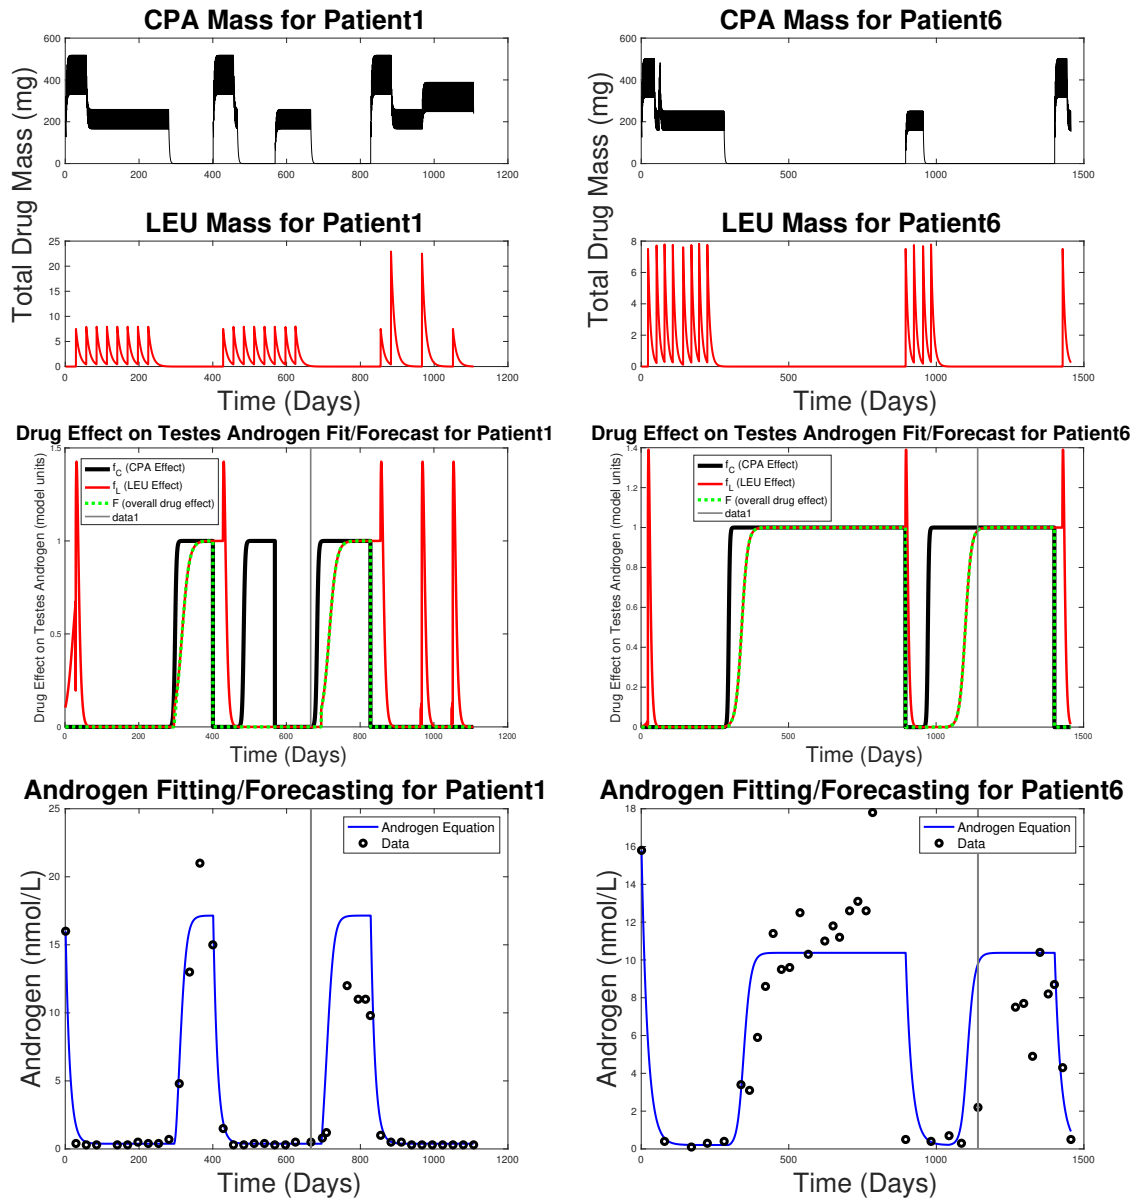

Figure 14: Patient1-specific and patient6-specific New Androgen Model results showing drug amount, drug effects, and androgen fit and forecast. Note the vertical grey line marks the end of the fitting period.

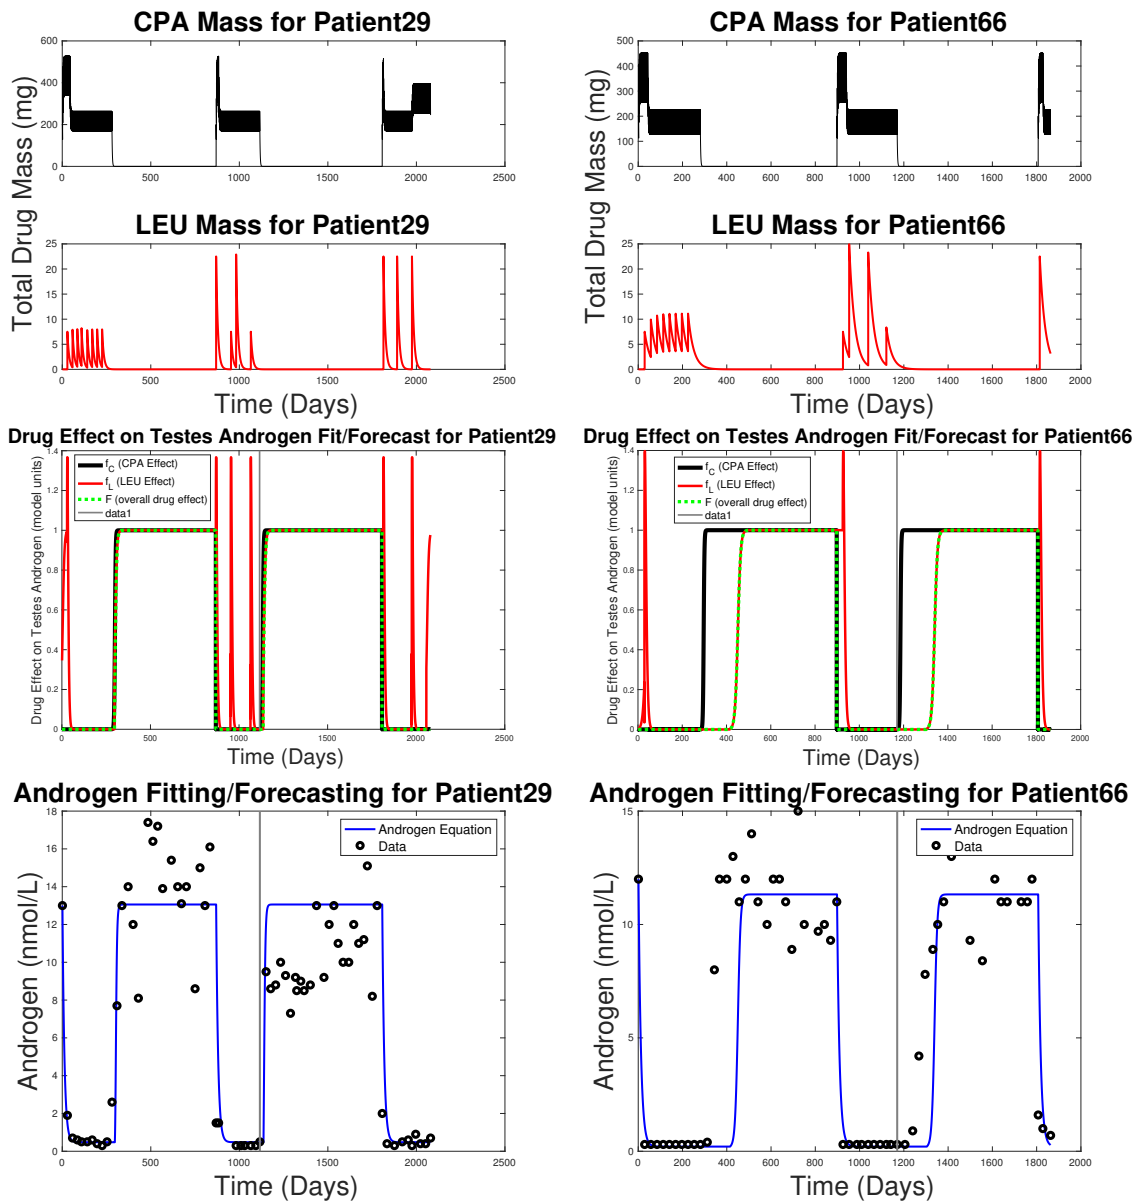

Figure 15: Patient29-specific and patient66-specific New Androgen Model results showing drug amount, drug effects, and androgen fit and forecast. Note the vertical grey line marks the end of the fitting period.

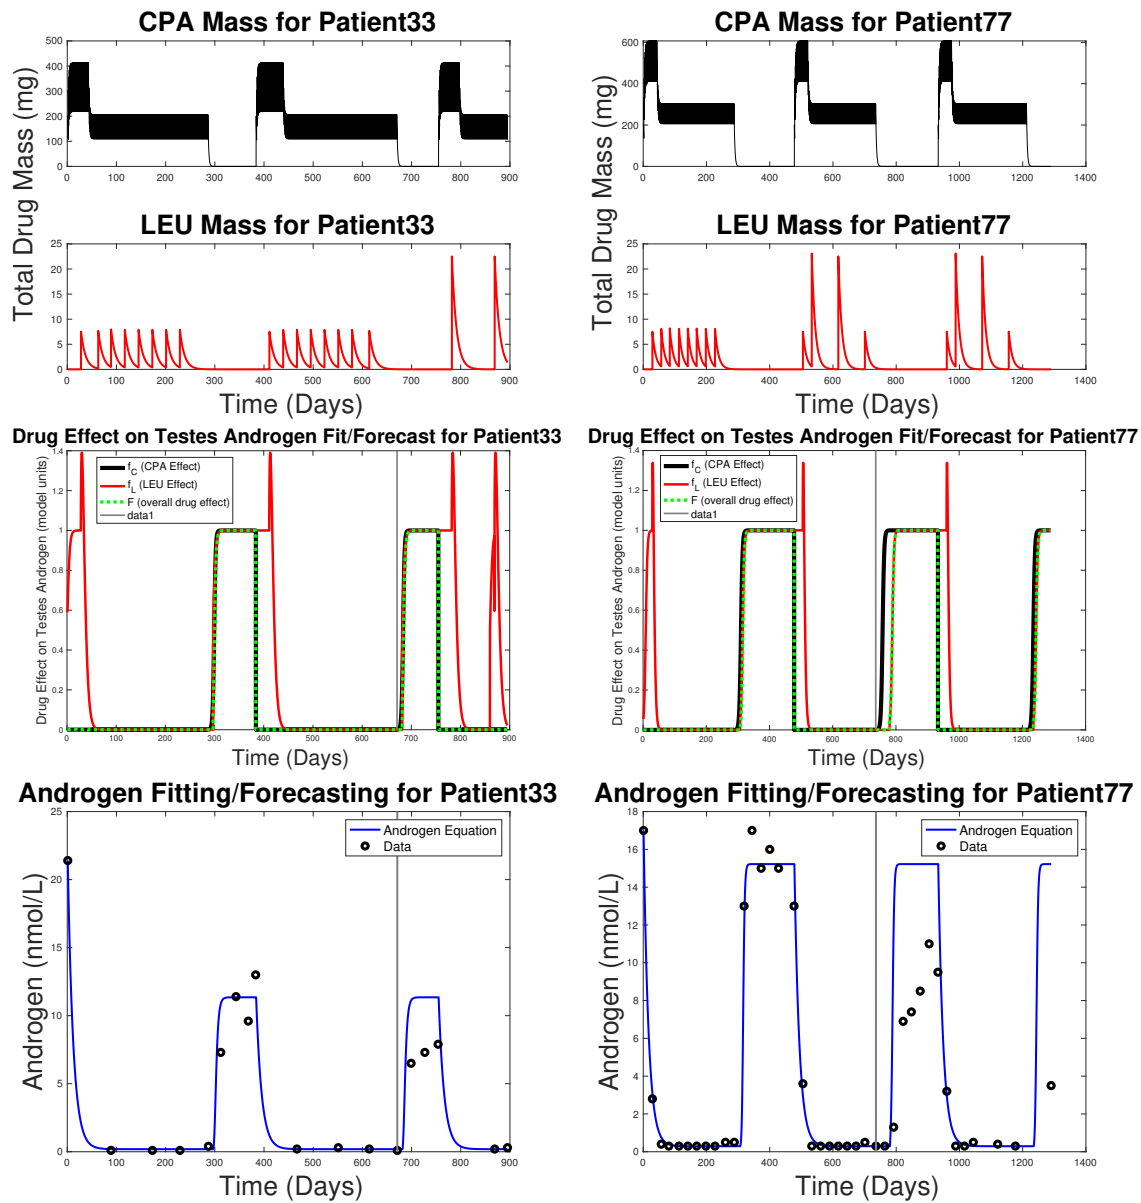

Figure 16: Patient33-specific and patient77-specific New Androgen Model results showing drug amount, drug effects, and androgen fit and forecast. Note the vertical grey line marks the end of the fitting period.



679 **5.4.2 Additional Figures for Androgen Comparison**

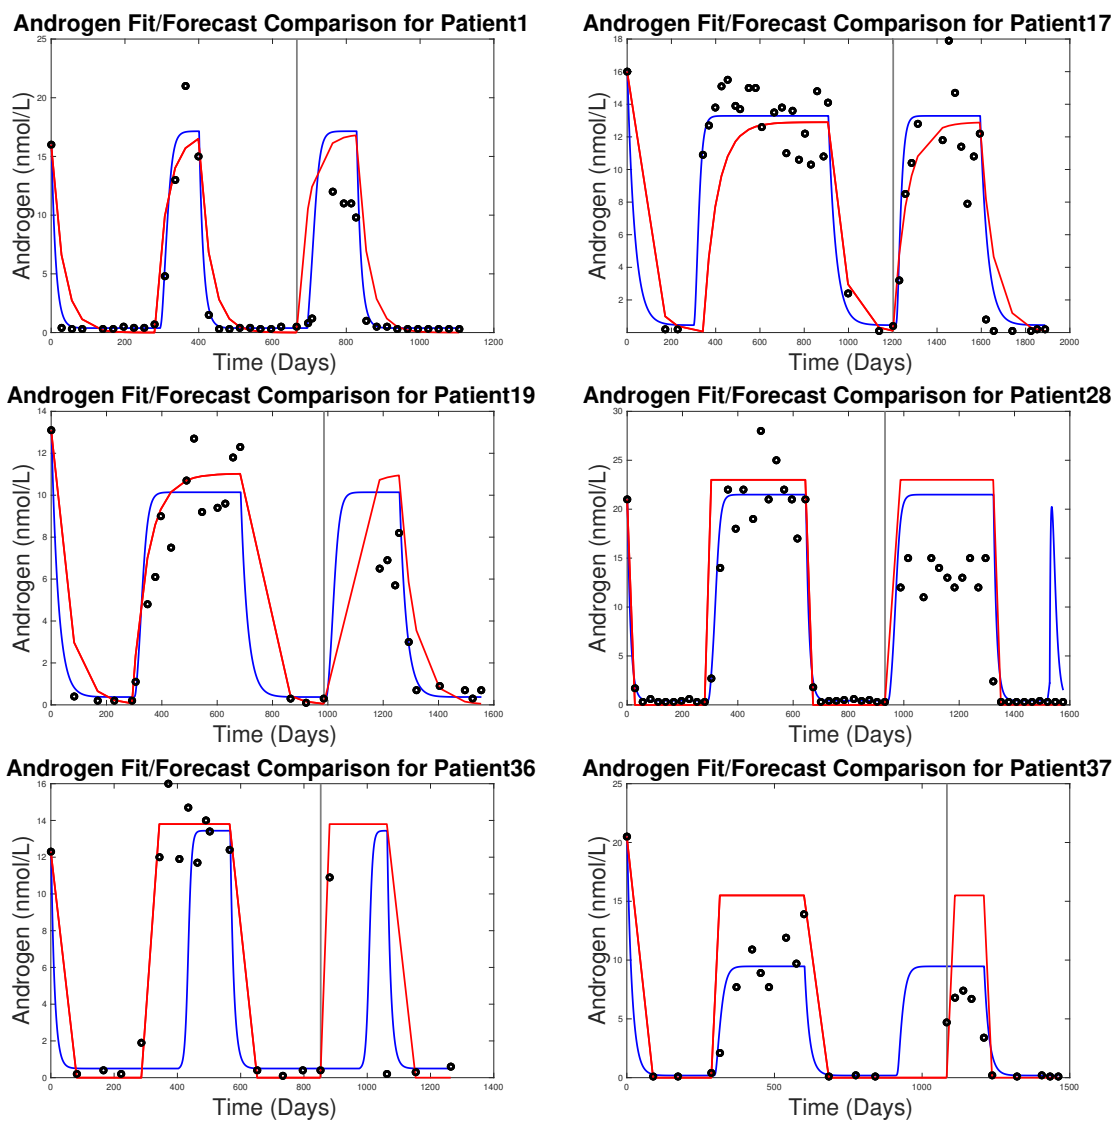

Figure 17: Androgen fitting and forecasting results for the Improved BK model (**red curves**) and New PSA Model (**blue curves**). The fitting and forecasting periods are separated by the vertical line at day 665 for patient 1, day 1201 for patient 17, day 985 for patient 19, day 931 for patient 28, day 852 for patient 36, and day 1083 for patient 37. Fitting and forecasting results are shown for data from patients 1, 17, 19, 28, 36, and 37 (**black circles**). For all models, we fit 1.5 cycles, then forecast the next cycle. For patient 28 the spike at the end occurs in the New Androgen Model due to large gaps in the injecting of LEU. This is a prime example of the need for a mechanisms for a long term effects the drugs have on overall androgen production.

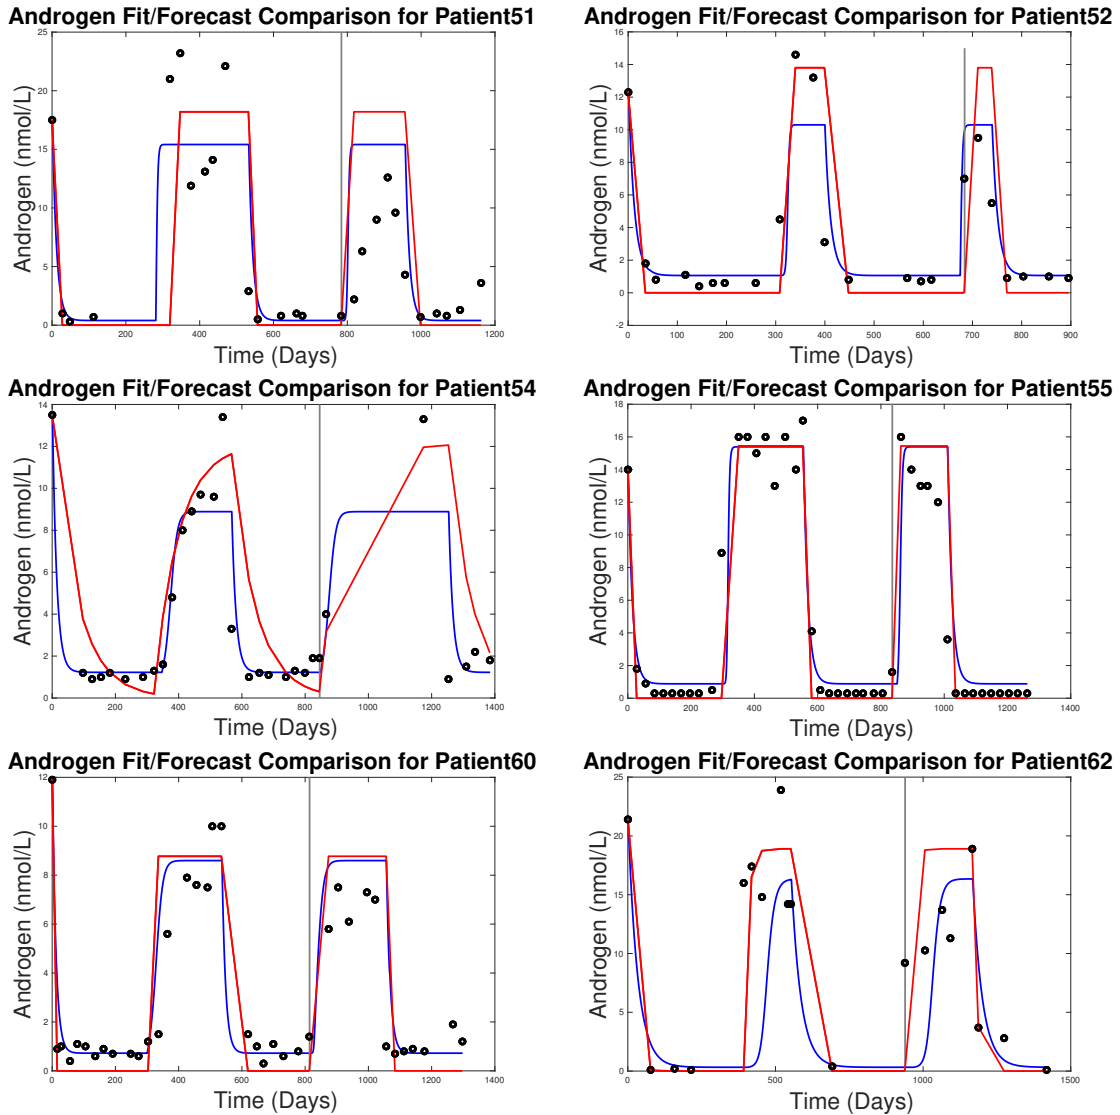

Figure 18: Androgen fitting and forecasting results for the Improved BK model (**red curves**) and New PSA model (**blue curves**). The fitting and forecasting periods are separated by the vertical line at day 783 for patient 51, day 683 for patient 52, day 845 for patient 54, day 835 for patient 55, day 813 for patient 60, and day 938 for patient 62. Fitting and forecasting results are shown for data from patients 51, 52, 54, 55, 60, and 62 (**black circles**). For all models, we fit 1.5 cycles, then forecast the next cycle.

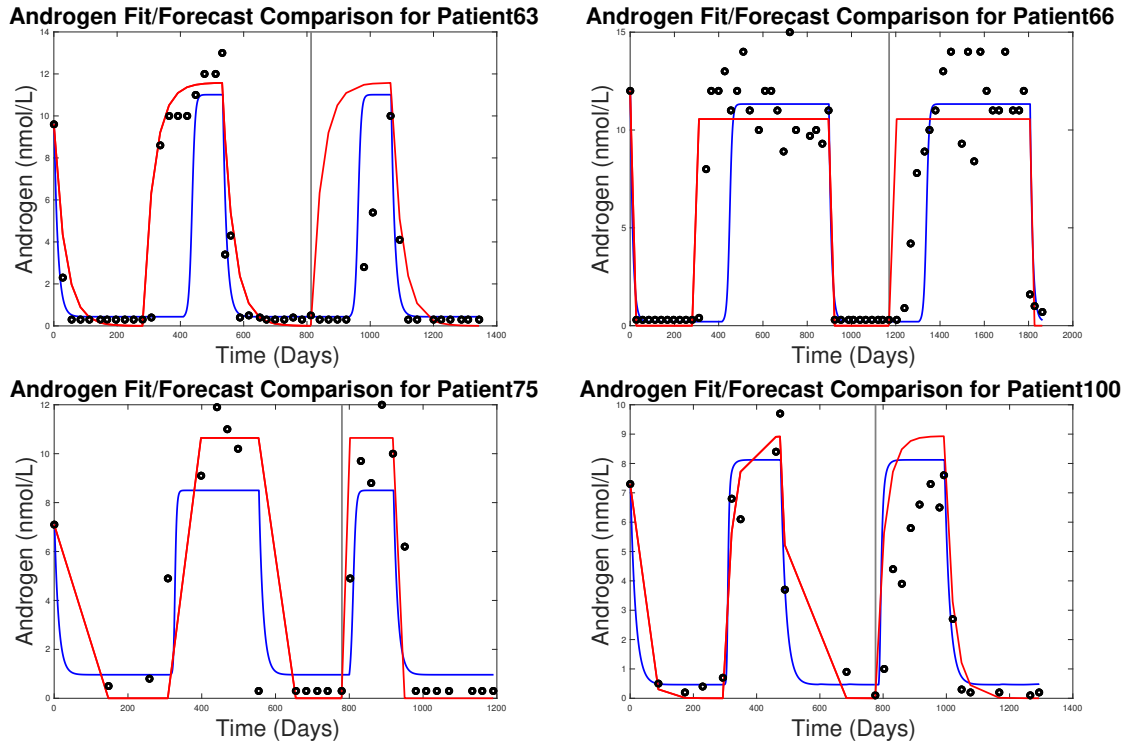

Figure 19: Androgen fitting and forecasting results for the Improved BK model (**red curves**) and New PSA Model (**blue curves**). The fitting and forecasting periods are separated by the vertical line at day 812 for patient 63, day 1169 for patient 66, day 779 for patient 75, and day 775 for patient 100. Fitting and forecasting results are shown for data from patients 63, 66, 75, 100 (**black circles**). For all models, we fit 1.5 cycles, then forecast the next cycle.

### 680 5.4.3 Additional Figures for PSA Comparison

681



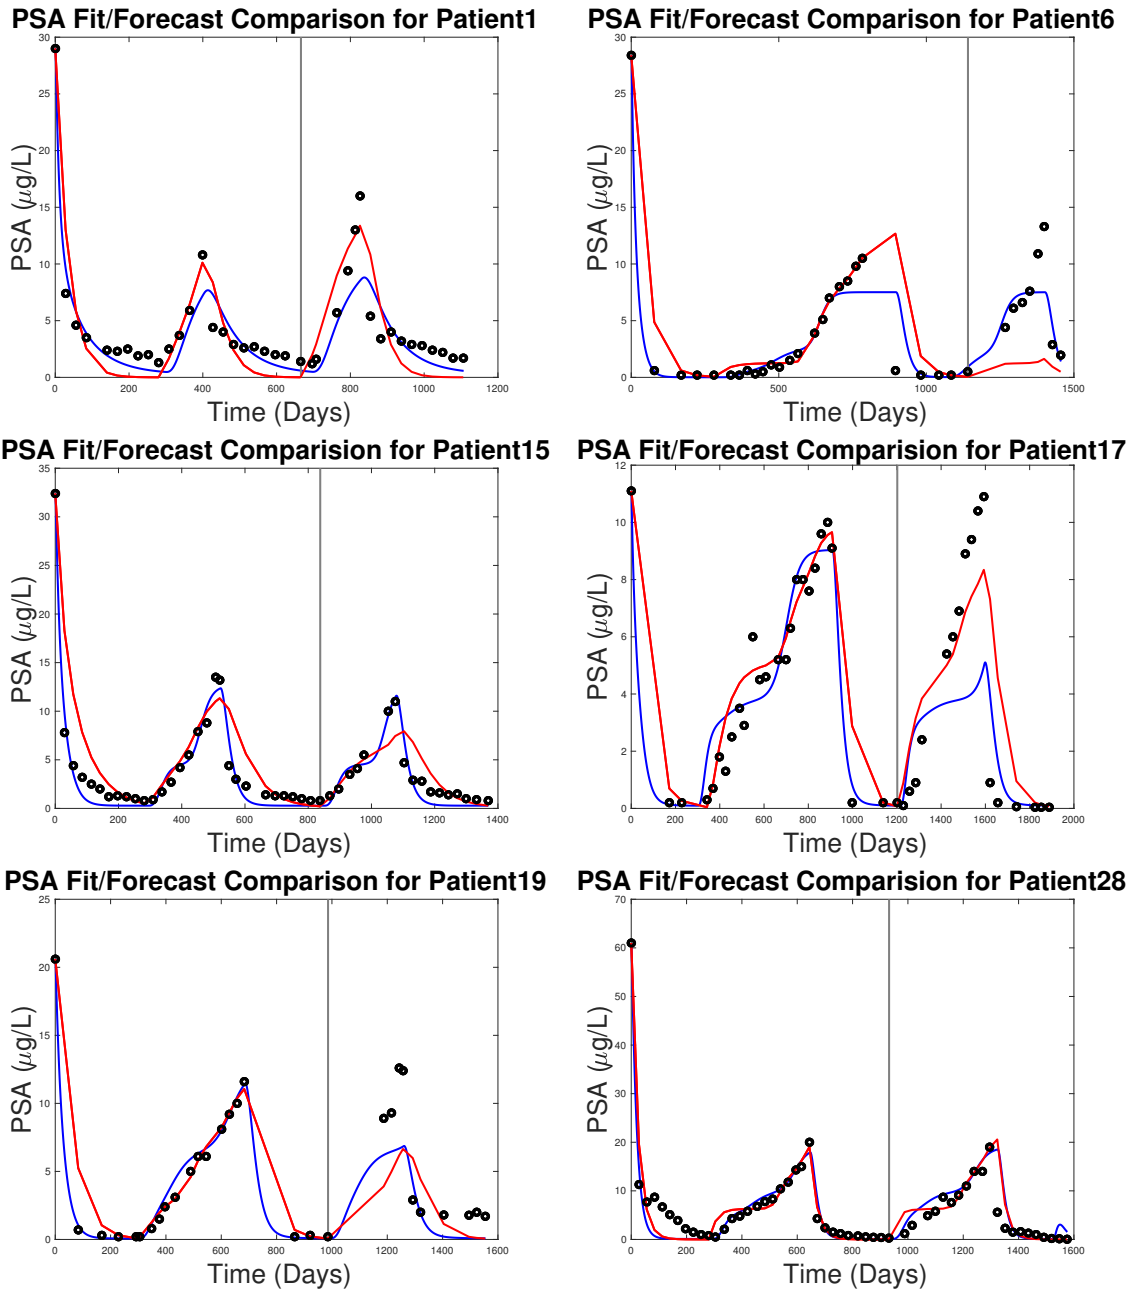

Figure 20: Prostate-specific antigen fitting and forecasting results for the Improved BK model (**red curves**) and New PSA Model (**blue curves**). The fitting and forecasting periods are separated by the vertical line at day 665 for patient 1, day 1140 for patient 6, day 837 for patient 15, day 1201 for patient 17, day 985 for patient 19, and day 931 for patient 28. Fitting and forecasting results are shown for data from patients 1, 6, 15, 17, 19, and 28 (**black circles**). For all models, we fit 1.5 cycles, then forecast the next cycle.

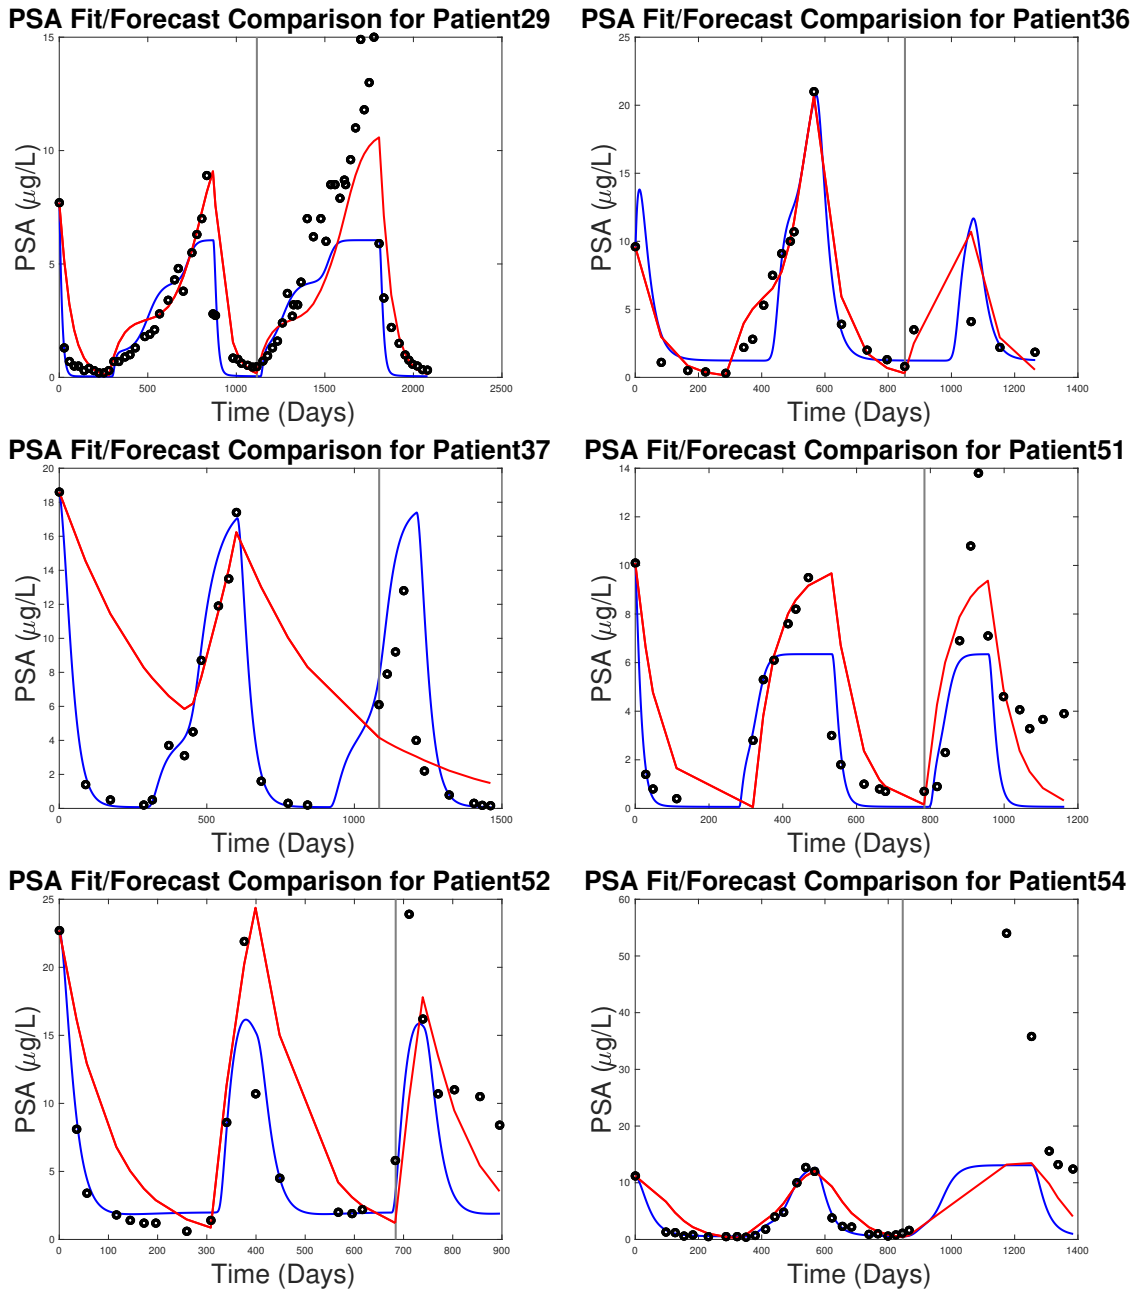

Figure 21: Prostate-specific antigen fitting and forecasting results for the Improved BK model (**red curves**) and New PSA Model (**blue curves**). The fitting and forecasting periods are separated by the vertical line at day 1115 for patient 29, day 852 for patient 36, day 1083 for patient 37, day 783 for patient 51, day 683 for patient 52, and day 845 for patient 54. Fitting and forecasting results are shown for data from patients 29, 36, 37, 51, 52 and 54 (**black circles**). For all models, we fit 1.5 cycles, then forecast the next cycle.

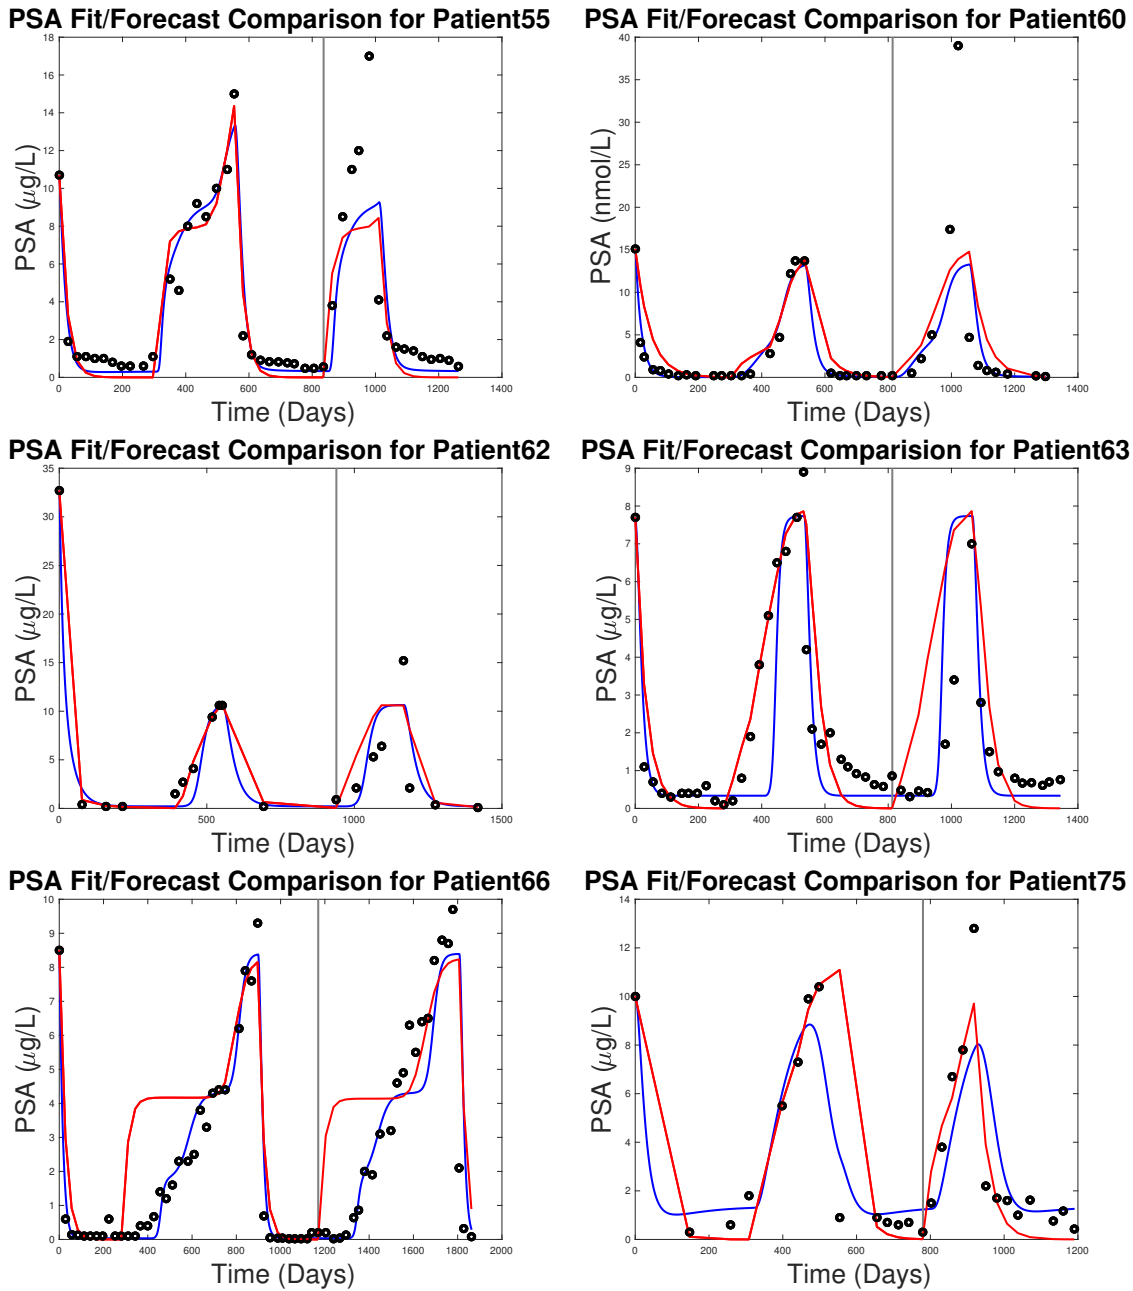

Figure 22: Prostate-specific antigen fitting and forecasting results for the Improved BK model (**red curves**) and New PSA Model (**blue curves**). The fitting and forecasting periods are separated by the vertical line at day 835 for patient 55, day 813 for patient 60, and day 938 for patient 62, day 812 for patient 63, day 1169 for patient 66, and day 779 for patient 75. Fitting and forecasting results are shown for data from patients 55, 60, 62, 63, 66, and 75 (**black circles**). For all models, we fit 1.5 cycles, then forecast the next cycle.

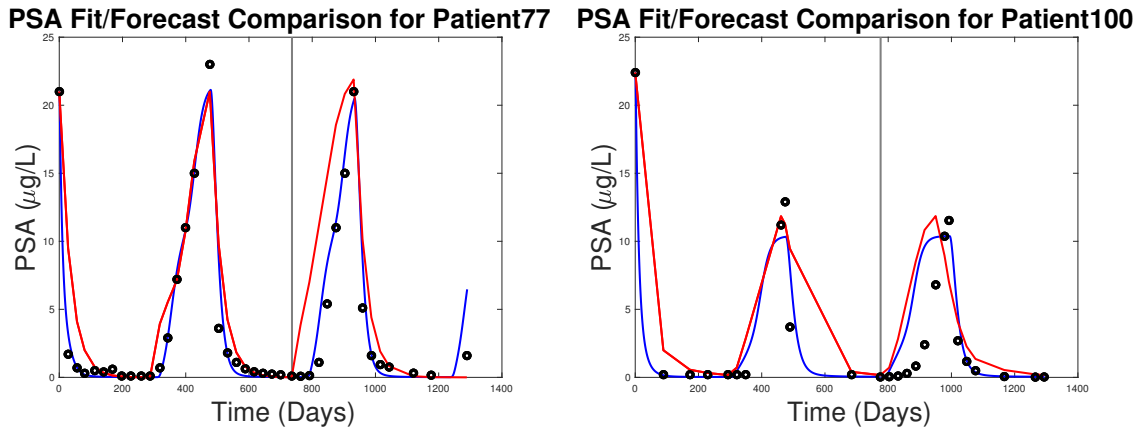

Figure 23: Prostate-specific antigen fitting and forecasting results for the Improved BK model (**red curves**) and New PSA Model (**blue curves**). The fitting and forecasting periods are separated by the vertical line at day 735 for patient 77 and day 775 for patient 100. Fitting and forecasting results are shown for data from patients 77 and 100 (**black circles**). For all models, we fit 1.5 cycles, then forecast the next cycle.

682

**Matlab code used for fitting/forecasting can be provided upon request.**
